# Supplementary figures and images for: Alkylaminophenol and GPR17 Agonist for Glioblastoma Therapy: A Combinational Approach for Enhanced Cell Death Activity
Source: MDPI journal article supplement (doi:10.3390/cells10081975), 2021-08-03

**A**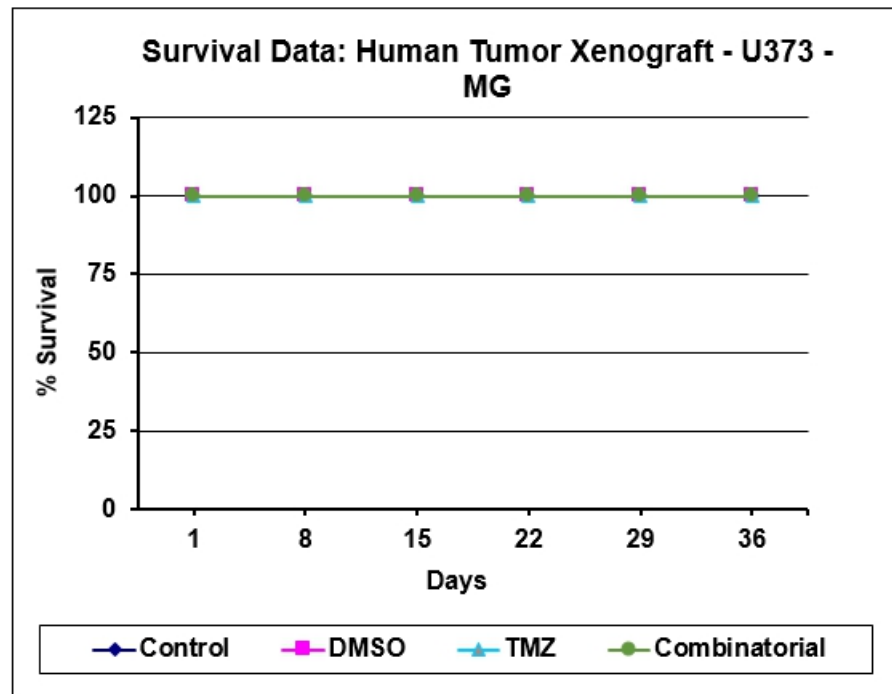**B**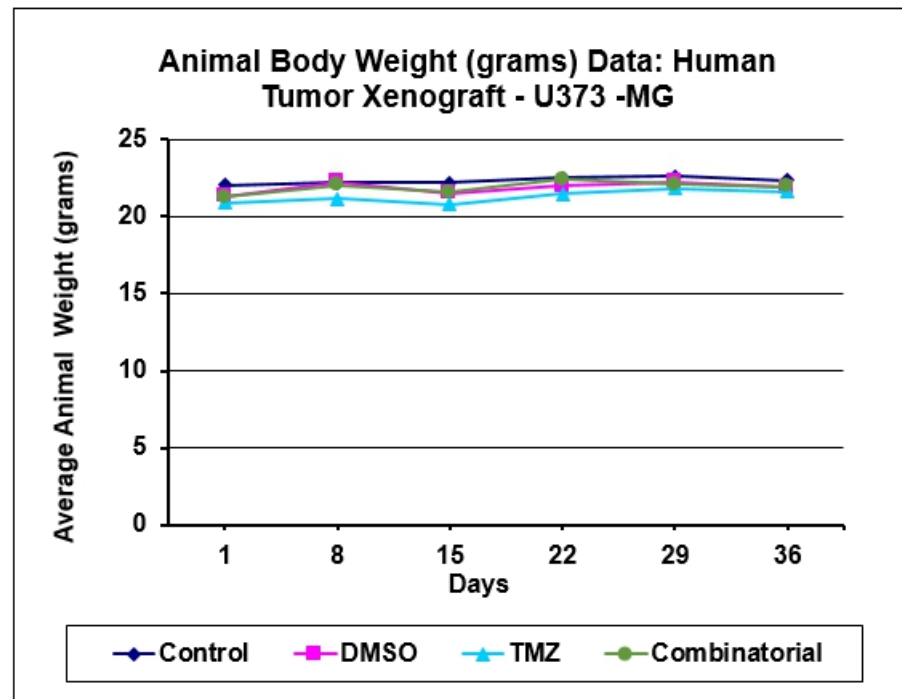

Supplement: s1 [file s1]
